# Supplementary material for: Investigation of cloud point extraction for the analysis of metallic nanoparticles in a soil matrix
Source: Royal Society of Chemistry journal article supplement (doi:10.1039/c6en00322b), 2016-10-19

## Electronic Supplementary Information (ESI)

# Investigation of cloud point extraction for the analysis of metal nanoparticles in a soil matrix

Hind El Hadri and Vincent A. Hackley

Materials Measurement Science Division, National Institute of Standards and Technology, 100  
Bureau Drive, Gaithersburg, MD 20899-8520

Figure S1: Single particle inductively coupled plasma spectrometry (spICP-MS) derived size distribution of native citrate-stabilized BBI AuNPs<sup>1</sup> with a nominal size of 60 nm (BBI60).

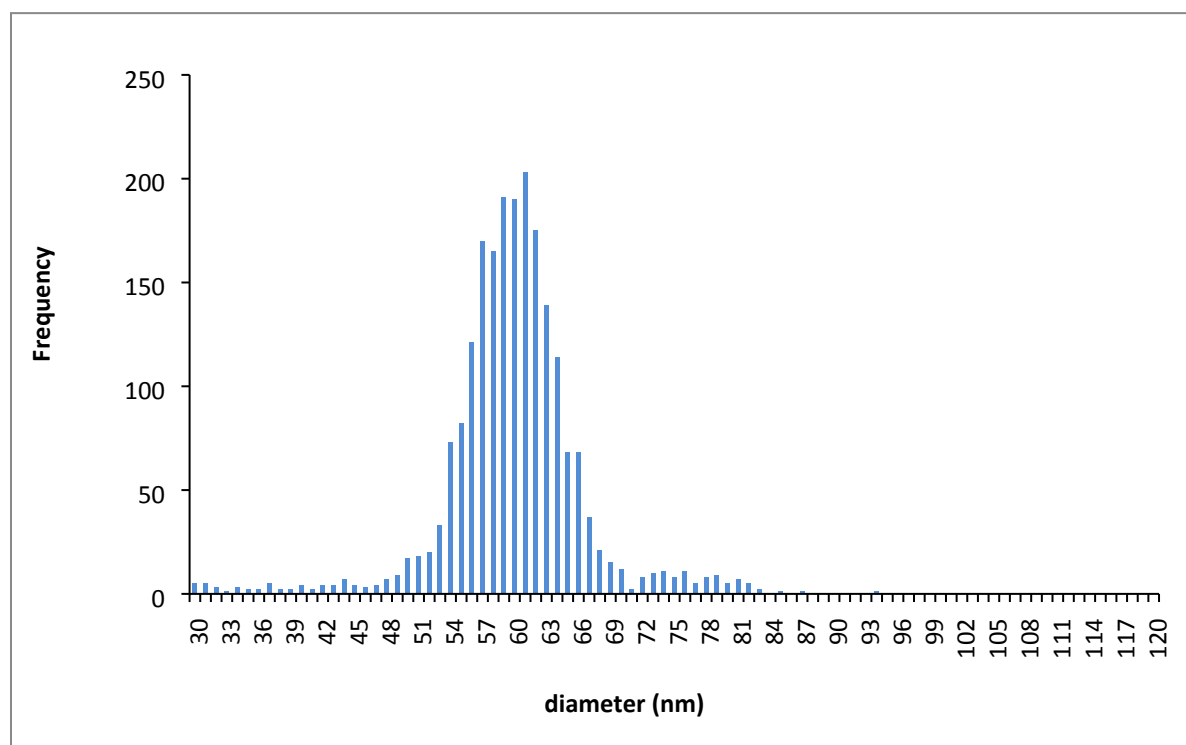

<sup>1</sup> The identification of any commercial product or trade name does not imply endorsement or recommendation by the National Institute of Standards and Technology.

Figure S2: Representative example of the mass distribution for a BBI60 AuNP sample extracted with TX-114 + CaCl<sub>2</sub> as determined by spICP-MS

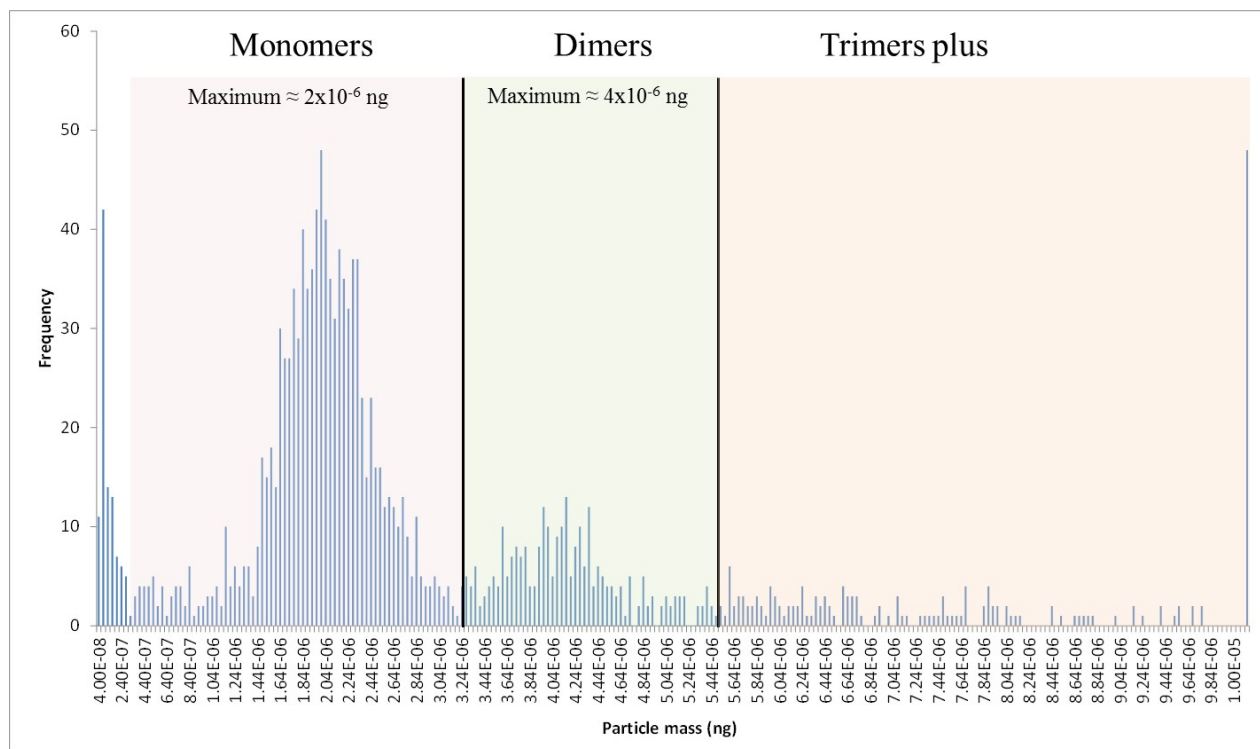

Figure S3: Cloud point extraction (CPE) recovery as a function of nominal AuNP diameter (BBI10, BBI30 and BBI60) using a) TX-114 alone and b) TX-114 + NaCl as determined after digestion of the extract with aqua regia (AR) and analysis by ICP-MS. The uncertainties represent one standard deviation of 3 to 10 replicates.

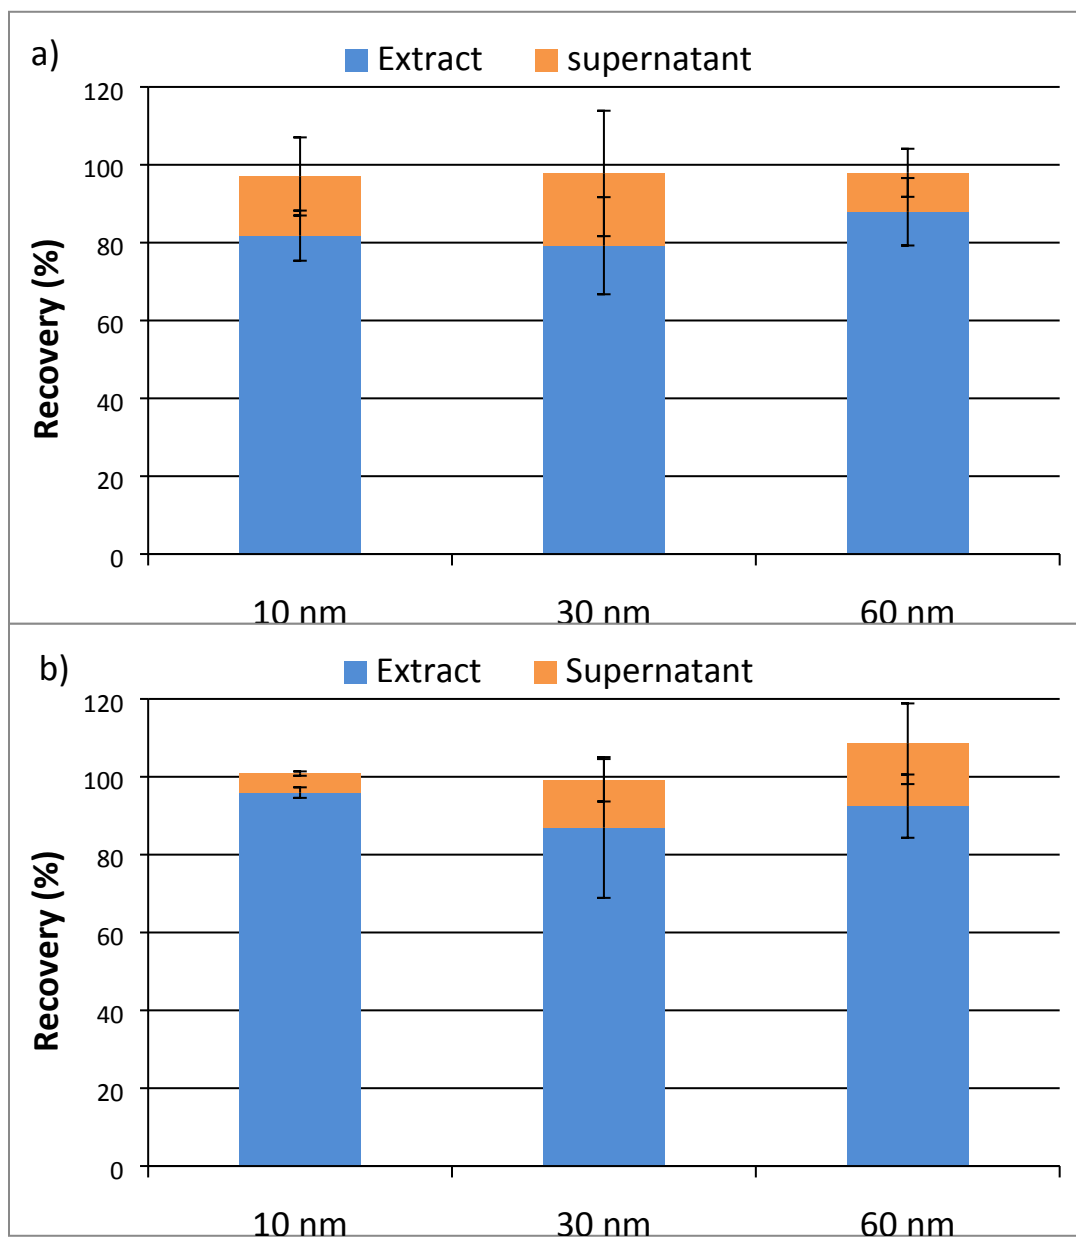

Figure S4: spICP-MS size distributions for BBI30 AuNPs with different surface coatings after CPE using TX-114 alone, with NaCl, CA or EDTA

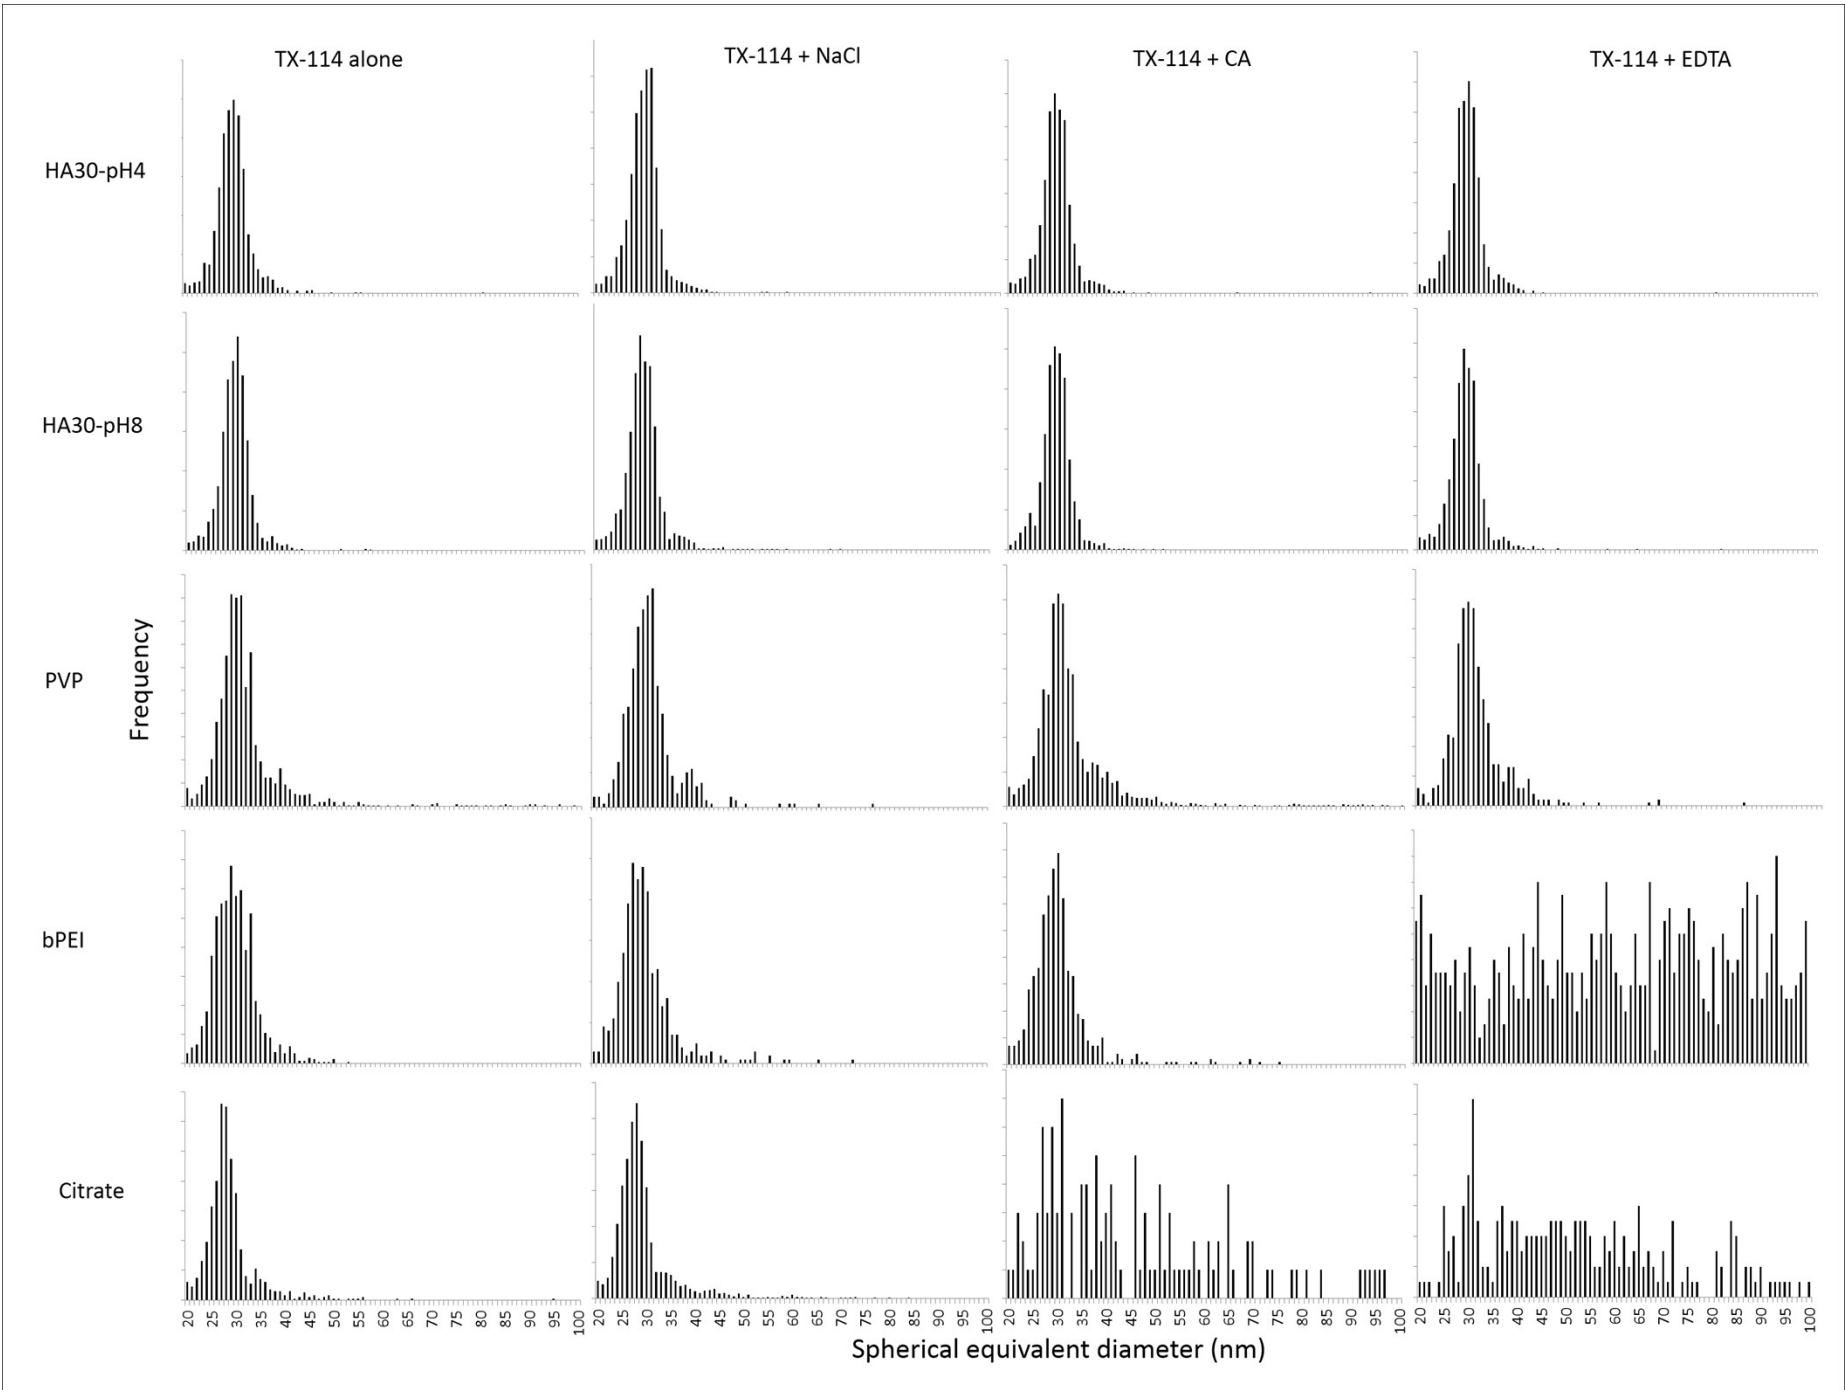

Figure S5: Visual observation of the extraction of HA-treated AuNPs (nominal size of 30 nm, BBI30) as a function of the additive during CPE using TX-114 as a surfactant

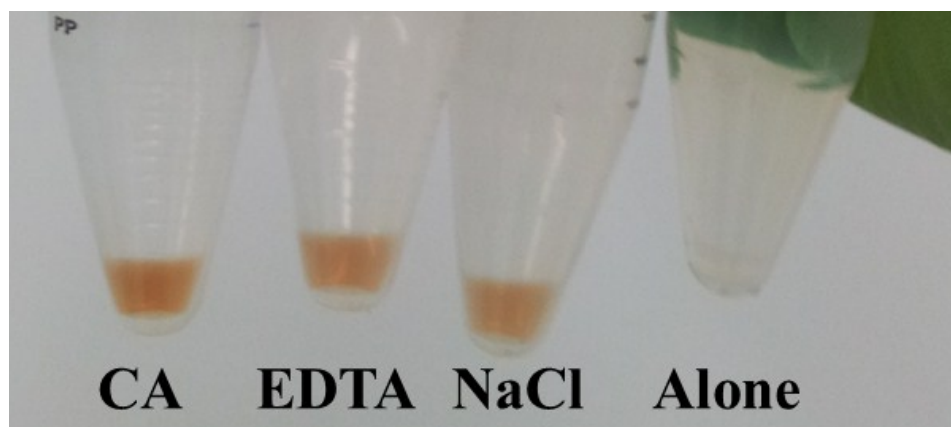

Figure S6: Fractograms (MALS signal at 90° scattering angle) for BBI60 using SDS in the mobile phase ( $0.1 \text{ mmol L}^{-1} \text{ SDS} + 0.4 \text{ mmol L}^{-1} \text{ NH}_4\text{NO}_3$ ); replicate fractograms shown.

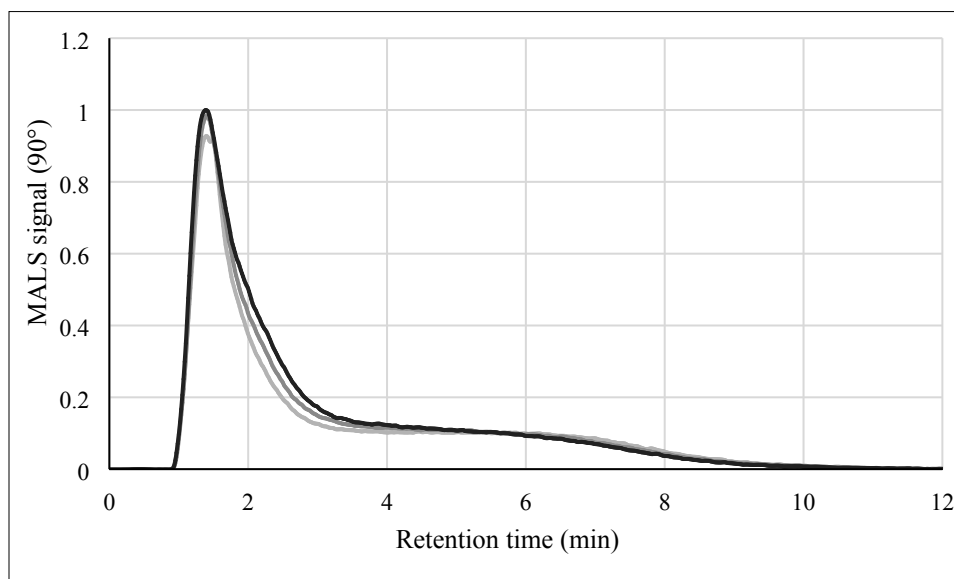

Figure S7: Fractograms of AuNP replicates with a nominal size of a) BBI30 and b) BBI60.

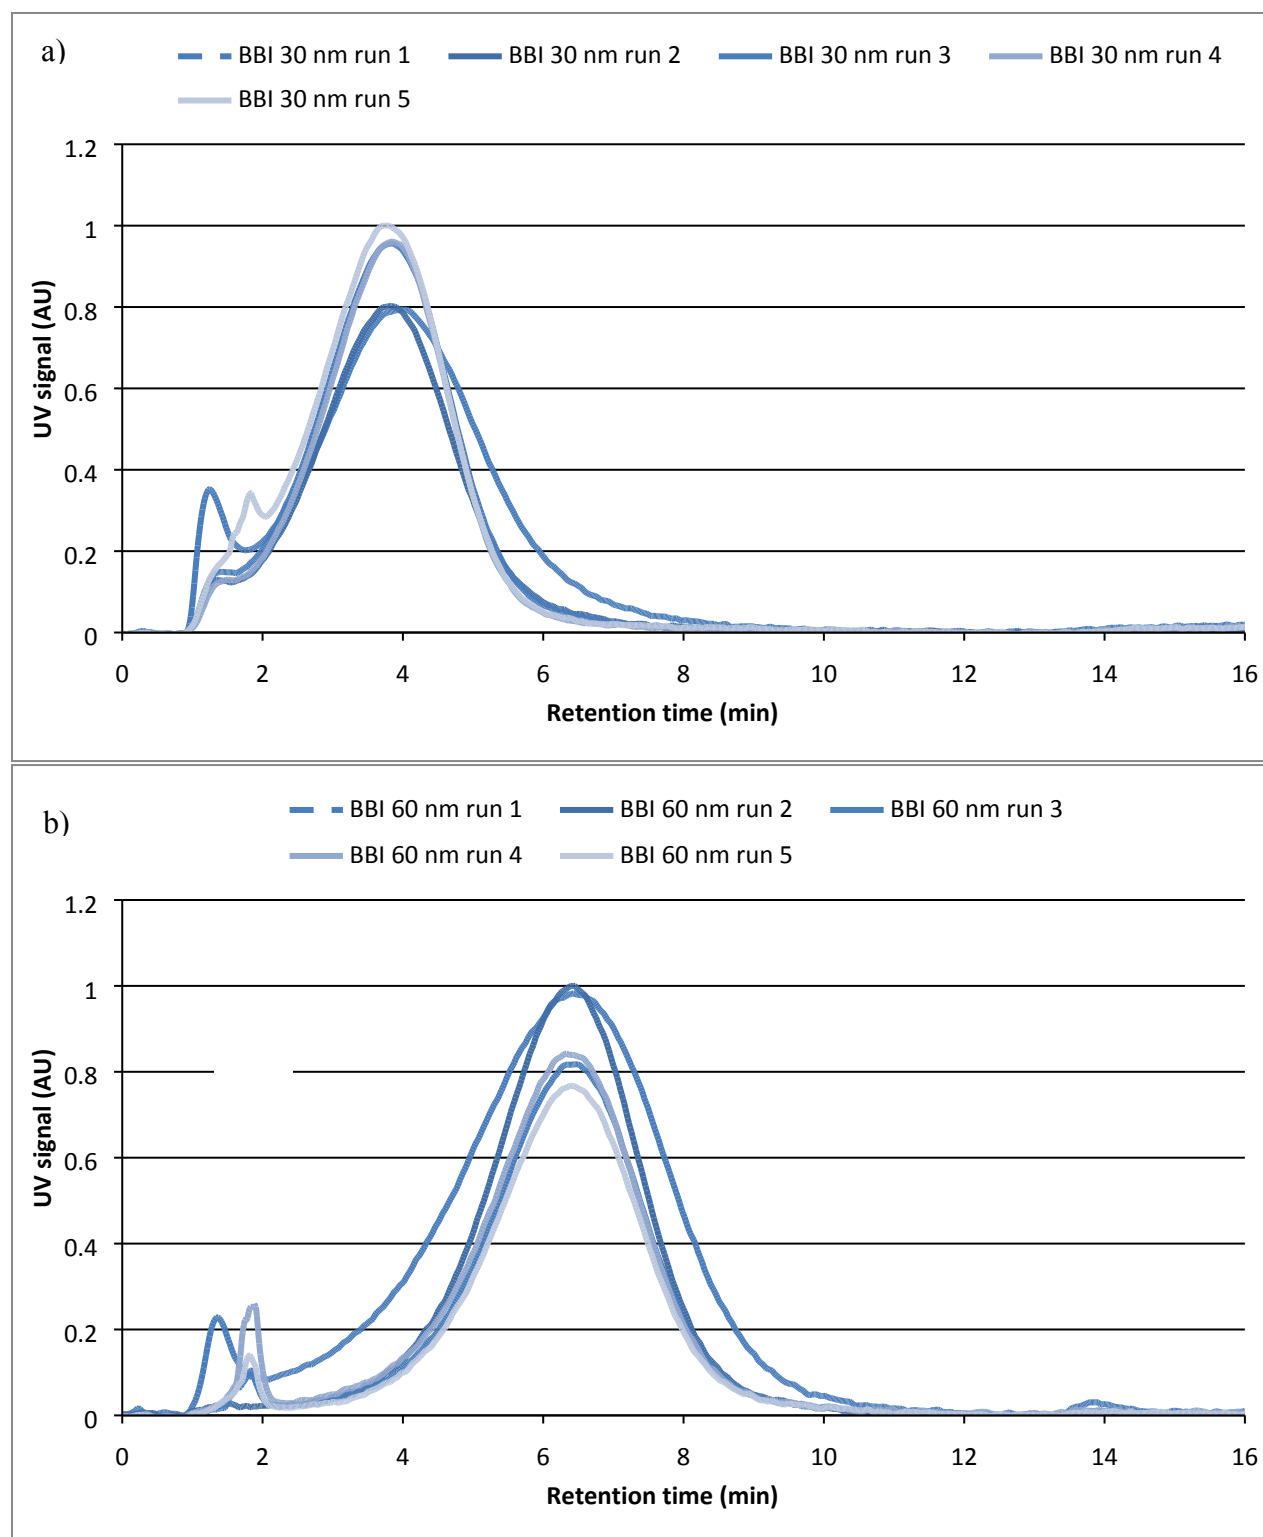

Figure S8: a) Fractograms of BBI60 with TX-114 at 13 ng kg<sup>-1</sup> (blue) and 0.2 ng kg<sup>-1</sup> (red), each signal is scaled against its own magnitude with MALS signal recorded at an angle of 90°, b) ICP-MS signal of BBI60 with TX-114 at 0.2 ng kg<sup>-1</sup>.

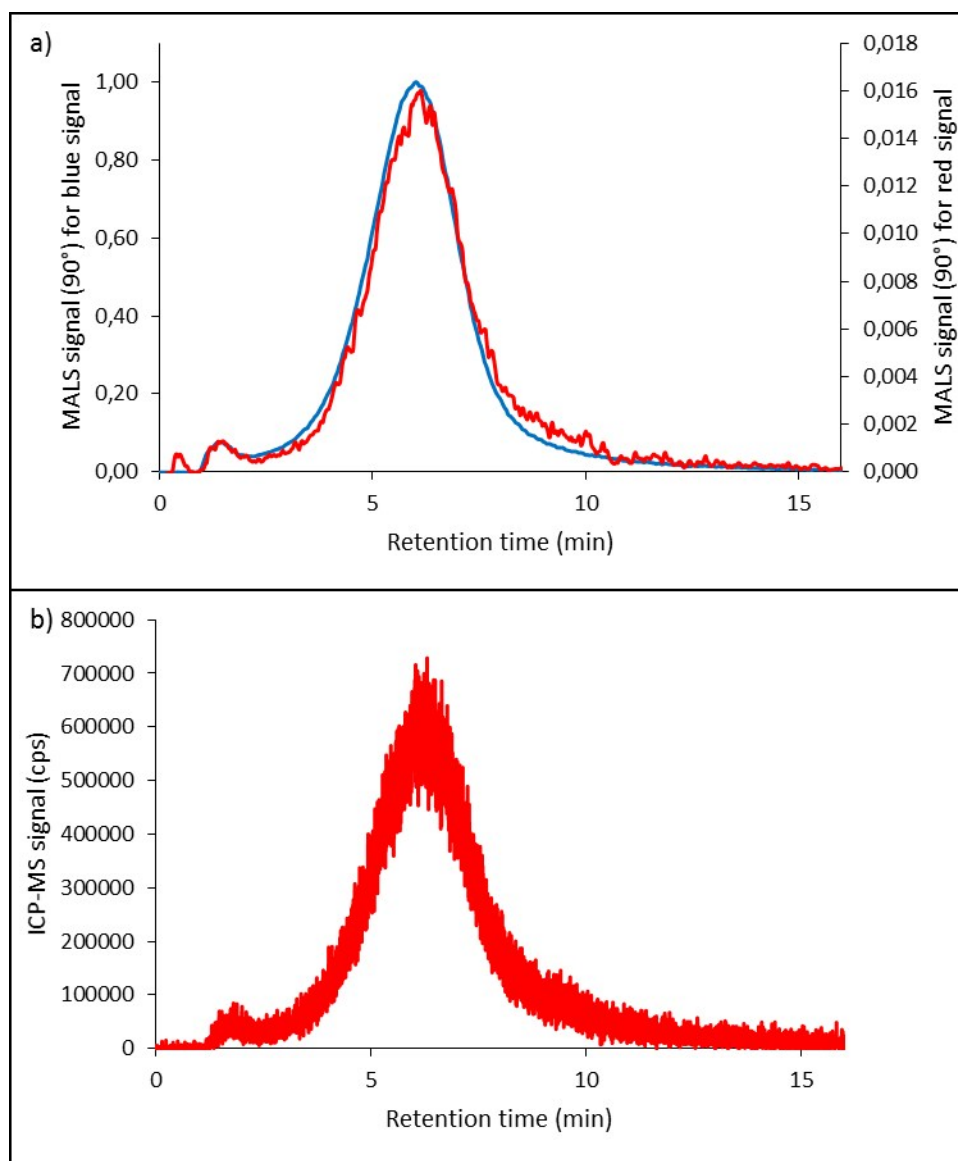

Figure S9: spICP-MS derived size distribution for BBI60 AuNPs after CPE with an initial concentration of a)  $10 \mu\text{g L}^{-1}$  and b)  $100 \mu\text{g L}^{-1}$

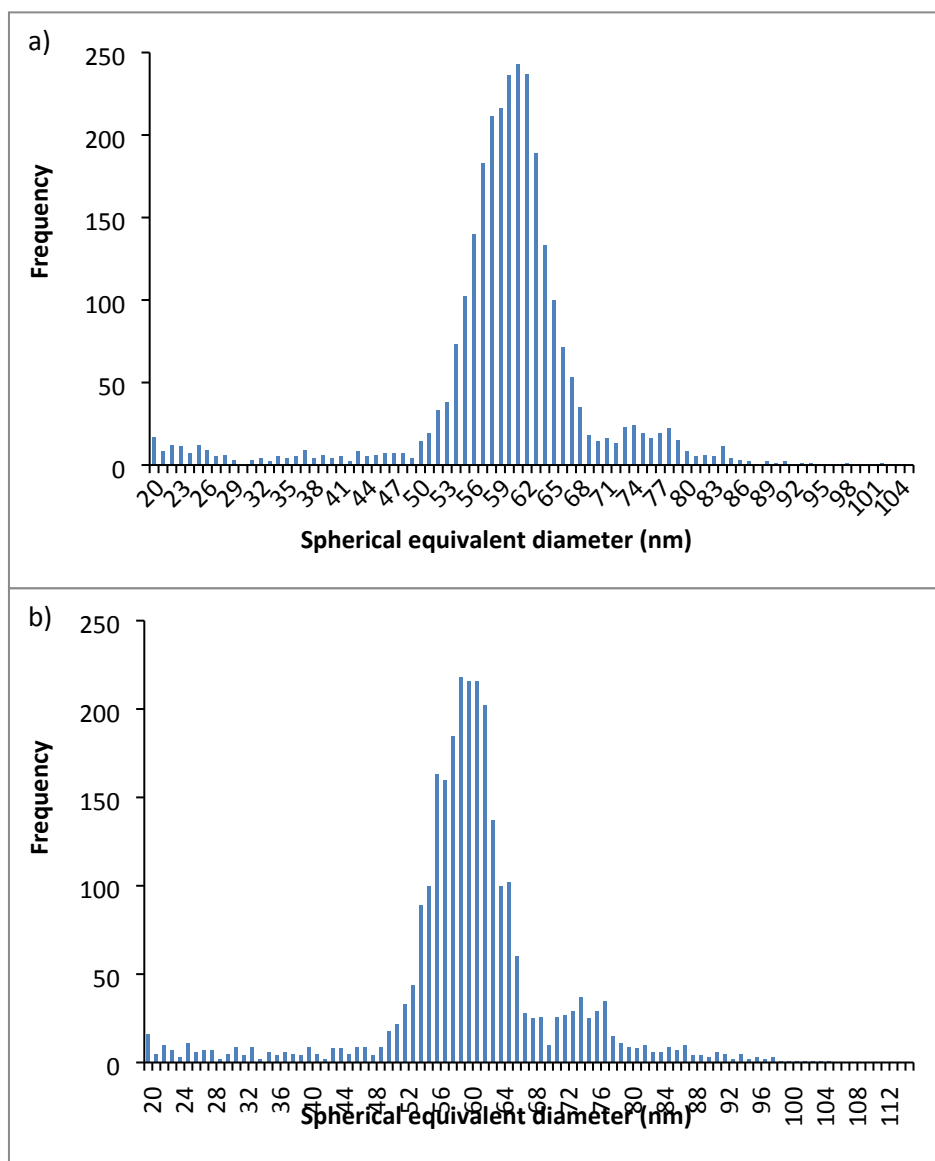

Figure S10: Expansion of  $^{197}\text{Au}$  signal from BBI60 measured by ICP-MS (see Figure 11 in main text)

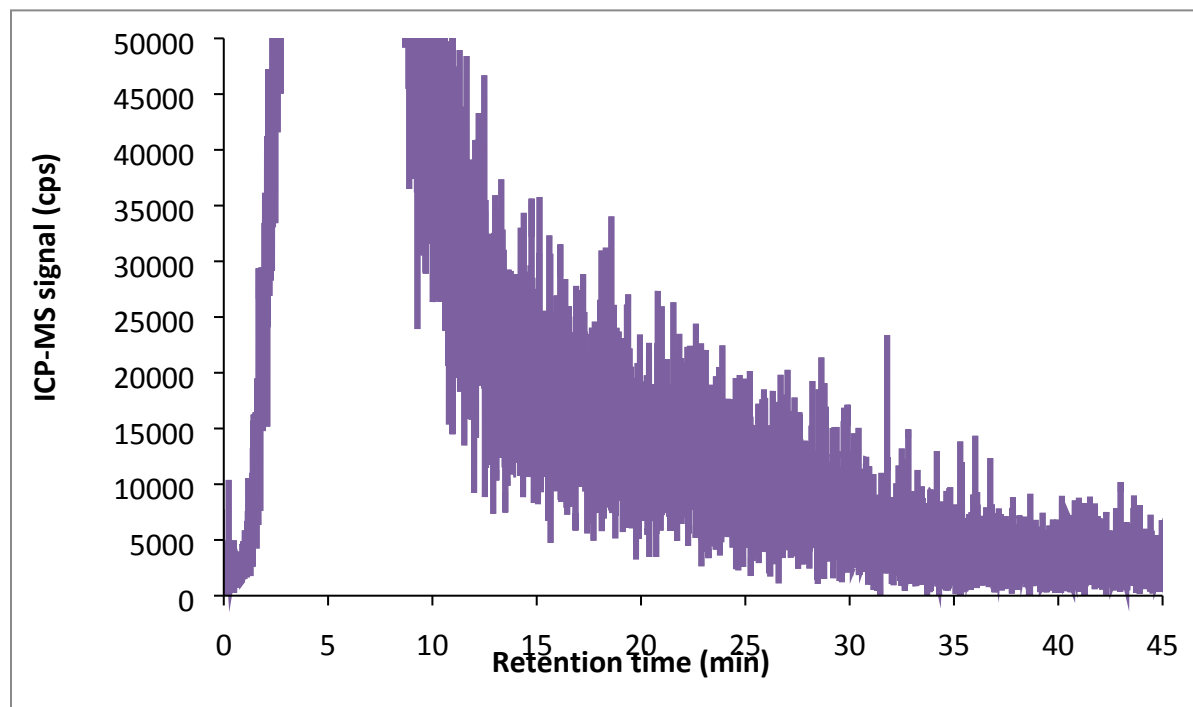

Supplement: c6en00322b1.pdf [file c6en00322b1.pdf]
